# Supplementary material for: Testing the effects of perimeter fencing and elephant exclosures on lion predation patterns in a Kenyan wildlife conservancy
Source: PeerJ. 2016 Feb 11;4:e1681. doi: 10.7717/peerj.1681 (PMC4756753; doi:10.7717/peerj.1681)
Supplement: Data S1 [file peerj-04-1681-s001.xlsx]

## Sheet: Sheet1
Date	Species	Age	Sex	X	Y	COD	Location
2013-01-04	PZ	A	U	319700	27300	lion	Mlima hewa
2013-10-03	GZ	A	M	319700	27300	lion	mlima hewa
2008-01-24	Waterbuck	A	M	317300	24200	Lion	NA
2005-07-29	PZ	U	U	317785	25221	Lion	NA
2010-09-09	PZ	A	U	318194	23484	Lion	Kona ya Mbuni
2012-06-12	Eland	A	U	318195	23484	Lion	Kona ya Mbuni
2010-08-10	Giraffe	A	M	318268	23428	Lion	Hankins campsite
2009-08-17	GZ	A	M	318272	20651	Lion	dam ya charlie
2013-04-27	PZ	A	U	318300	25000	lion	mwarate ya kathiari
2014-07-07	PZ	A	U	318300	25000	Lion	NA
2013-08-22	PZ	A	F	318500	25000	lion	west gate
2013-11-11	PZ	A	U	318500	25000	lion	weste gate
2014-07-08	PZ	A	F	318500	25000	Lion	NA
2014-07-09	PZ	A	U	318500	25000	Lion	NA
2014-08-22	PZ	A	F	318500	24000	Lion	Corner safi
2010-09-09	PZ	A	U	318572	24940	Lion	Luai ya west gate
2005-09-03	PZ	U	U	318670	20751	Lion	NA
2006-08-06	Buffalo	A	M	318672	20751	Lion	NA
2007-07-04	GZ	U	U	318673	20751	Lion	NA
2007-07-09	Warthog	U	U	318674	20751	Lion	NA
2008-07-11	Buffalo	U	U	318675	20751	Lion	NA
2009-06-15	PZ	SA	F	318676	20751	Lion	luai ya ngarandare
2011-08-13	PZ	A	U	318677	20751	Lion	Luai ya ngare Ndare
2012-06-17	PZ	A	M	318678	20751	Lion	Luai ya ngare ndare
2012-09-19	PZ	A	F	318679	20751	Lion	Luai ya ngare ndare
2014-04-19	PZ	SA	F	318889	23623	Lion	Lera ya cardown
2014-06-06	PZ	SA	F	318890	24993	Lion	Corner safi
2014-08-27	Giraffe	SA	M	318890	24993	Lion	Corner safi
2011-12-18	Giraffe	A	M	318897	18466	Lion	Mbogani ya Ndito
2009-11-15	Eland	A	F	319150	28908	Lion	Kona Mbaya
2011-07-19	PZ	A	F	319182	20480	Lion	Changarawe ya Charlie
2013-07-18	GZ	A	U	319182	20480	lion	Dam ya mama
2014-06-11	GZ	A	U	319182	20480	Lion	NA
2012-05-23	Eland	A	M	319183	20480	Lion	Changarawe ya charlie
2006-02-13	Impala	U	M	319200	24500	Lion	NA
2012-06-04	PZ	A	U	319201	23600	Lion	Mlima Faru
2012-06-25	PZ	A	U	319243	28788	Lion	Parking ya fuzz
2006-01-31	PZ	U	U	319300	29400	Lion	NA
2011-06-19	Giraffe	A	F	319301	29400	Lion	Pigos
2006-07-28	PZ	A	U	319345	23953	Lion	NA
2012-02-26	PZ	A	U	319388	26701	Lion	Boma inne
2013-09-16	PZ	A	M	319400	24300	lion	mlima faru
2014-06-30	PZ	A	M	319400	24300	Lion	NA
2013-06-14	PZ	A	U	319500	23500	lion	Lera ya kaa Down
2014-06-27	PZ	A	U	319500	23500	Lion	NA
2014-08-24	PZ	U	U	319788	26987	Lion	Boma inne
2010-02-02	Giraffe	A	U	319830	23293	Lion	Luai ya shamba
2005-07-12	Waterbuck	U	U	319916	24264	Lion	NA
2005-08-18	PZ	U	U	319917	24264	Lion	NA
2014-07-07	PZ	A	U	319958	24413	Lion	Milima tangi
2013-11-10	PZ	A	M	319979	29409	lion	pigos
2014-07-30	PZ	A	M	319979	29409	Lion	NA
2014-04-28	Giraffe	SA	U	319983	25093	Lion	Luai ya shamba
2012-04-01	PZ	A	M	319988	25548	Lion	Barabara ya pipe
2014-08-08	PZ	A	F	320208	29132	Lion	Milima ngware
2014-04-21	PZ	A	F	320270	24072	Lion	Milima tangi
2012-01-22	PZ	A	U	320341	24674	Lion	Mlima Tanki
2014-09-19	PZ	SA	U	320341	23778	Lion	Milima tanki
2006-01-01	Buffalo	U	M	320345	19078	Lion	NA
2013-01-14	PZ	A	M	320345	24674	lion	mlima loishimi
2014-07-02	PZ	A	M	320345	24674	Lion	NA
2006-06-19	Buffalo	A	F	320346	19078	Lion	NA
2011-07-19	Giraffe	A	M	320348	19078	Lion	Mbogani ya ndito
2013-07-14	Giraffe	J	U	320348	29897	lion	mlima ngware
2014-07-31	Giraffe	J	U	320348	29897	Lion	NA
2011-12-02	PZ	A	M	320349	19078	Lion	Maji ya njora
2012-06-01	PZ	SA	U	320400	24300	Lion	Mlima safi
2010-09-11	Giraffe	J	U	320470	24241	Lion	Mlima Safi
2010-06-22	GZ	A	F	320502	19934	Lion	Mlima Manyangalo
2012-09-08	PZ	A	U	320517	29326	Lion	Mlima Ngware
2009-03-21	PZ	U	U	320518	29326	Lion	mlima Ngware
2010-09-16	PZ	A	U	320519	29326	Lion	Mlima Ngware
2011-07-21	Eland	A	F	320523	25813	Lion	Shamba
2009-09-14	Eland	A	F	320570	25439	Lion	Shamba mrefu
2006-02-13	PZ	U	U	320597	26435	Lion	NA
2007-08-22	PZ	U	U	320599	26435	Lion	NA
2011-12-17	PZ	A	M	320604	19145	Lion	Laga ya Mwateni
2013-01-16	PZ	A	F	320604	19145	lion	Ilmwateni
2014-06-06	PZ	A	F	320604	19145	Lion	NA
2014-05-13	PZ	A	M	320631	28867	Lion	Milima ngware
2004-03-17	GZ	U	U	320675	19977	Lion	NA
2014-08-14	PZ	A	M	320700	27300	Lion	Mlima Hewa
2006-09-25	Oryx	U	U	320701	27300	Lion	NA
2005-07-10	PZ	U	U	320727	26492	Lion	NA
2006-09-04	PZ	U	F	320800	29300	Lion	NA
2006-08-20	GZ	U	U	320976	29876	Lion	NA
2006-08-31	Eland	U	M	320977	29876	Lion	NA
2011-07-18	PZ	A	U	321124	23765	Lion	Mlima Loishimi
2010-08-24	Giraffe	A	U	321367	21700	Lion	Mekedi
2013-11-22	PZ	A	U	321367	21700	lion	mlima mekedi
2014-06-14	PZ	A	U	321367	21700	Lion	NA
2010-11-16	Ostrich	A	U	321368	21700	Lion	Mekedi
2009-12-16	PZ	A	F	321392	19849	Lion	Mnanda ya Manyagalo Zamani
2005-08-05	GZ	SA	U	321474	25656	Lion	NA
2006-01-05	Eland	U	F	321543	27762	Lion	NA
2010-02-03	PZ	A	U	321568	20451	Lion	Mnanda ya manyangalo
2013-10-01	PZ	A	U	321600	28300	lion	lewa safaricamp
2014-07-22	PZ	A	U	321600	28300	Lion	NA
2012-09-21	PZ	A	F	321770	19431	Lion	Mnanda ya manyangalo
2012-09-17	Waterbuck	A	M	321771	19436	Lion	Mnanda ya manyangalo
2014-06-09	Giraffe	SA	U	321909	29818	Lion	Ndikir Ya shabaa
2011-10-28	PZ	A	F	321930	19586	Lion	Mlima nyoka
2014-10-18	PZ	SA	U	321965	25132	Lion	Dam kubwa
2006-03-02	Eland	A	U	322100	16700	Lion	NA
2014-08-20	PZ	A	U	322234	19700	Lion	Sussannah Rouse
2014-07-31	PZ	J	U	322276	27626	Lion	Mukora's Dam
2011-11-10	PZ	A	M	322335	21300	Lion	Alan root
2014-08-08	PZ	A	M	322373	27851	Lion	Milima mukora
2010-04-02	Giraffe	J	U	322400	23300	Lion	Boma ya domoko
2013-12-26	Eland	U	U	322400	23300	lion	boma ya ndomuku
2014-06-26	Eland	U	U	322400	23300	Lion	NA
2012-07-13	PZ	A	U	322401	23300	Lion	Boma ya domoko
2014-09-01	PZ	A	U	322499	24891	Lion	Miliuma loishimi
2013-06-16	buffalo	A	M	322500	30600	lion	laga ya HQ
2014-08-02	Buffalo	A	M	322500	30600	Lion	NA
2014-04-21	Gazelle	A	F	322595	26979	Lion	Juu ya kisima ya kangauro
2014-06-07	PZ	A	F	322662	22342	Lion	Alan root
2014-07-31	Giraffe	J	U	322669	22269	Lion	Parking ya Willy Robert
2014-08-27	PZ	A	F	322669	22269	Lion	Parking ya Willy Robert
2013-04-19	Giraffe	A	M	322800	31200	lion	meza
2014-08-03	Giraffe	A	M	322800	31200	Lion	NA
2014-08-04	PZ	SA	F	322815	26245	Lion	Kangauro
2014-05-08	Unknown	U	U	322845	22468	Lion	Milima njora
2014-07-31	PZ	J	U	322863	27114	Lion	Mukora's Dam
2014-05-07	Giraffe	SA	M	322878	20848	Lion	Milima njora
2009-11-27	Giraffe	A	U	322900	28900	Lion	Mlima Simba
2013-02-04	PZ	A	M	322900	28900	lion	Mlima simba
2013-09-23	PZ	A	M	322900	28900	lion	mlima simba
2013-09-28	PZ	A	M	322900	28900	lion	mlima simba
2014-07-23	PZ	A	M	322900	28900	Lion	NA
2014-07-24	PZ	A	M	322900	28900	Lion	NA
2014-07-25	PZ	A	M	322900	28900	Lion	NA
2014-08-09	PZ	U	U	322900	28900	Lion	Laga ya simba
2006-01-18	Buffalo	U	U	322901	28900	Lion	NA
2006-07-17	Giraffe	A	U	322902	28900	Lion	NA
2011-03-21	PZ	A	U	322904	28900	Lion	Mlima Simba
2012-05-19	PZ	A	U	322905	25100	Lion	Mlima Kangauru
2014-04-12	PZ	A	F	323026	30420	Lion	Morani
2014-05-22	Buffalo	A	F	323081	29768	Lion	Laga ya simba
2014-04-24	Impala	A	F	323167	26380	Lion	Ngiloriti ya kangauro
2014-04-24	Impala	A	M	323167	26380	Lion	Ngiloriti ya kangauro
2014-08-25	Oryx	U	U	323200	28700	Lion	Mwarate ya Mkora
2014-09-05	Buffalo	A	U	323200	18900	Lion	Corner ya manyangalo
2006-06-13	PZ	U	U	323201	32160	Lion	NA
2010-07-19	Waterbuck	A	M	323265	18855	Lion	Kona ya Manyangalo
2010-08-29	Buffalo	J	U	323266	18855	Lion	Kona ya Manyangalo
2009-09-29	Buffalo	SA	F	323312	19694	Lion	miti mirefu
2013-03-03	Giraffe	SA	F	323329	26563	lion	Dam mpya
2014-07-13	Giraffe	SA	F	323329	26563	Lion	NA
2005-07-09	Dikdik	U	U	323342	31239	Lion	NA
2011-04-28	Giraffe	A	F	323343	31239	Lion	Mombasa
2012-01-12	PZ	A	M	323356	24924	Lion	Mlima Kangauru
2014-08-29	PZ	U	U	323500	30500	Lion	Mlima Mzungu
2014-06-11	Eland	SA	M	323721	21731	Lion	Alan root
2010-08-19	GZ	A	M	323743	18157	Lion	Kona ya Manyangalo
2012-07-22	GZ	J	U	323788	27987	Lion	Mlima mzungu
2012-09-07	Greater Kudu	A	U	323841	30941	Lion	Morani
2008-05-28	Warthog	U	U	323900	28200	Lion	NA
2014-08-26	GZ	A	F	323900	28900	Lion	Laga ya chui
2004-01-11	GZ	U	U	323901	28200	Lion	NA
2011-09-06	PZ	U	U	323903	28900	Lion	Laga ya Chui
2014-09-10	PZ	A	F	323951	26336	Lion	Kangauro
2012-05-09	Eland	A	M	324050	18960	Lion	Kahawa
2014-09-04	Warthog	A	M	324051	18775	Lion	Daraja ya susana
2011-08-27	Giraffe	A	U	324109	30689	Lion	Fumbi
2014-10-06	GZ	A	F	324118	19329	Lion	Corner ya manyangalo
2014-10-06	GZ	SA	U	324118	19329	Lion	Corner ya manyangalo
2011-08-24	PZ	A	M	324120	28987	Lion	Sirikoi
2011-11-24	Giraffe	A	F	324121	28987	Lion	Nyumba moja Sergoi
2006-03-01	Eland	U	U	324127	18875	Lion	NA
2014-08-28	PZ	A	M	324269	31242	Lion	Fumbi
2011-09-23	GZ	A	F	324354	19393	Lion	Kahawa
2006-07-28	PZ	A	U	324478	22987	Lion	NA
2006-09-12	GZ	A	M	324479	22987	Lion	NA
2011-01-08	PZ	A	U	324500	18500	Lion	Mbogani ya slaughter
2007-09-30	Eland	U	U	324501	18500	Lion	NA
2011-08-26	Giraffe	A	M	324502	15700	Lion	Ngeturai ya melita
2009-07-26	Eland	A	U	324541	22932	Lion	Luai nyekundu ya W. Robbert
2011-10-17	Impala	A	U	324542	22932	Lion	Luai nyekundu
2012-04-20	PZ	A	F	324543	21700	Lion	Manyangalo gate
2012-04-20	PZ	J	u	324544	21700	Lion	Manyangalo gate
2009-08-19	Giraffe	SA	M	324563	18456	Lion	slaughter area
2011-08-17	Elephant	J	U	324600	28000	Lion	laga ya Anna
2013-09-18	PZ	A	F	324626	26563	lion	kiboo plains
2014-07-14	PZ	A	F	324626	26563	Lion	NA
2011-01-07	GZ	A	F	324783	18978	Lion	Mlima twiga
2011-10-17	PZ	A	U	324785	18978	Lion	Mlima Twiga
2012-05-23	PZ	A	U	324800	32432	Lion	Mlima mwitia
2005-06-18	GZ	U	U	324801	19500	Lion	NA
2012-06-16	PZ	J	U	324802	32000	Lion	Fumbi ya chini
2014-04-18	Tortoise	A	M	324819	29076	Lion	Dam ya fumbi
2014-04-18	Warthog	A	M	324819	29076	Lion	Dam ya fumbi
2014-04-18	PZ	A	U	324844	29062	Lion	Dam ya fumbi
2014-05-05	Eland	A	F	324849	29076	Lion	Fumbi Plain
2010-12-16	Greater Kudu	A	U	324864	31922	Lion	Lomei
2014-03-27	Giraffe	SA	M	324998	31444	Lion	Fumbi
2013-07-22	GZ	A	M	325073	18267	lion	kiwanja ya kariunga
2014-06-03	GZ	A	M	325073	18267	Lion	NA
2011-07-14	GZ	A	M	325095	27608	Lion	Boma ya mungu
2012-08-12	PZ	A	U	325096	27608	Lion	Boma ya mungu
2011-01-08	PZ	A	U	325129	18897	Lion	Barabara ya charlie
2009-10-26	PZ	U	F	325159	27541	Lion	mboma ya mungu
2014-08-11	Waterbuck	U	M	325200	18900	Lion	Daraja ya wilderness
2005-11-22	PZ	U	U	325201	18900	Lion	NA
2006-05-25	Warthog	A	U	325202	31000	Lion	NA
2014-04-25	Warthog	A	U	325203	19235	Lion	Luai ya karionga
2011-06-06	Giraffe	A	M	325204	17700	Lion	Ngare niting
2014-04-25	Impala	A	M	325217	19494	Lion	Luai ya karionga
2010-04-17	GZ	A	F	325262	17657	Lion	Ngareniting
2010-12-25	PZ	A	U	325263	18855	Lion	Nyumba nyekundu
2014-08-16	GZ	A	M	325300	18300	Lion	Mlima Twiga
2014-05-08	Warthog	A	F	325302	21377	Lion	Bosnia
2014-05-07	PZ	SA	M	325351	20085	Lion	Manyangalo gate
2014-06-19	Warthog	A	M	325497	19842	Lion	Luai ya karionga
2011-01-22	Buffalo	J	U	325500	23000	Lion	Willy Roberts
2011-08-25	PZ	A	M	325500	16700	Lion	Ukuta ya Mlima William
2011-09-19	Elephant	J	U	325500	17100	Lion	Williams
2014-09-01	Waterbuck	A	F	325571	17835	Lion	Boma ya faro
2014-05-14	Warthog	A	F	325575	21375	Lion	Bosnia
2014-06-10	GZ	A	U	325598	20257	Lion	Manyangalo gate
2009-12-24	PZ	U	U	325640	18749	Lion	Boma ya Faru
2010-03-23	PZ	A	U	325641	18749	Lion	Boma ya faru
2010-05-21	Buffalo	J	F	325642	18749	Lion	Boma ya faru
2013-05-12	PZ	J	U	325644	18749	lion	boma ya faru
2014-06-05	PZ	J	U	325644	18749	Lion	NA
2014-08-17	GZ	A	F	325644	18749	Lion	Boma ya faro
2014-08-18	Waterbuck	J	U	325644	18749	Lion	Chini ya boma faro
2012-07-20	GZ	J	U	325645	18749	Lion	Boma ya faru
2012-09-07	Eland	u	U	325646	18749	Lion	Boma ya faru
2014-05-05	PZ	SA	F	325660	28315	Lion	Fumbi ya juu
2005-08-23	GZ	U	U	325674	22509	Lion	NA
2005-10-11	GZ	U	U	325675	22509	Lion	NA
2005-12-10	GZ	U	U	325676	22509	Lion	NA
2006-02-06	Buffalo	U	F	325677	22509	Lion	NA
2011-02-04	GZ	A	M	325700	22000	Lion	Luai ya Willy roberts
2014-08-21	Giraffe	A	F	325720	23177	Lion	Sirikoi river
2014-08-03	Eland	A	M	325739	23593	Lion	Sirikoi
2007-06-18	Warthog	U	U	325797	28237	Lion	NA
2006-07-29	PZ	U	U	325798	28237	Lion	NA
2013-09-11	Giraffe	J	U	325821	29100	lion	Fumbi ya Juu
2014-07-26	Giraffe	J	U	325821	29100	Lion	NA
2014-08-31	PZ	A	M	325892	17749	Lion	Ngareniting house
2012-09-22	PZ	A	F	325900	31900	Lion	Fumbi
2014-06-13	Oryx	J	U	325900	31900	Lion	Fumbi ya chini
2014-04-02	Giraffe	A	M	325916	22242	Lion	Willy Roberts
2014-08-29	Impala	A	M	325916	22242	Lion	Sirikoi
2008-02-28	PZ	U	U	325987	25579	Lion	NA
2014-10-04	PZ	A	U	326029	25131	Lion	Kivuko ya sirkoi
2010-01-30	Waterbuck	A	M	326049	25517	Lion	Sergoi
2012-04-06	Warthog	SA	M	326067	19969	Lion	Laga ya bobongi
2009-02-25	Giraffe	SA	U	326068	19969	Lion	Laga ya Bobongi
2013-01-19	PZ	J	U	326068	19969	lion	Laga ya bobongi
2014-06-09	PZ	J	U	326068	19969	Lion	NA
2014-09-04	Giraffe	A	F	326084	27429	Lion	Langata ya gitoonga
2005-08-27	PZ	U	U	326101	22500	Lion	NA
2014-04-02	GZ	J	U	326130	18948	Lion	Mnanda ya Charlie
2014-06-09	PZ	A	F	326150	25816	Lion	Boma Ya mungu
2005-08-29	GZ	U	U	326200	22500	Lion	NA
2012-05-22	PZ	A	M	326241	17746	Lion	Ngareniting
2006-02-23	Buffalo	J	U	326300	16700	Lion	NA
2006-07-18	PZ	J	U	326300	30500	Lion	NA
2006-03-31	GZ	U	U	326301	30500	Lion	NA
2006-09-05	GZ	U	U	326302	30500	Lion	NA
2009-03-29	GZ	J	F	326400	18600	Lion	Luai ya charly
2014-08-19	GZ	A	M	326400	19600	Lion	Mtego ya twiga
2014-09-02	GZ	A	M	326400	18600	Lion	Luai ya Charlie
2014-08-31	Oryx	A	F	326454	21157	Lion	Bosnia
2011-07-25	GZ	A	F	326465	22050	Lion	Bom campsite
2006-11-08	PZ	SA	F	326467	22050	Lion	NA
2006-04-27	GZ	A	U	326469	22050	Lion	NA
2013-04-26	Oryx	U	U	326469	22050	lion	Bom campsite
2013-08-05	PZ	SA	F	326469	22050	lion	bom campsite
2014-06-17	PZ	SA	F	326469	22050	Lion	NA
2014-06-18	Oryx	U	U	326469	22050	Lion	NA
2006-01-03	Buffalo	U	M	326491	23331	Lion	NA
2005-02-10	Sitatunga	U	U	326492	23331	Lion	NA
2012-01-19	Giraffe	A	F	326500	31600	Lion	Mawe nyekundu leparua
2011-03-11	Buffalo	A	M	326501	31600	Lion	Leparua campsite
2010-04-13	Eland	A	M	326562	27333	Lion	Mlima Sagana
2011-11-23	GZ	A	M	326602	21500	Lion	Nyuma ya swamp
2014-09-03	GZ	A	F	326657	18704	Lion	Laga ya mwangi
2009-10-25	Buffalo	A	F	326661	21447	Lion	swamp
2010-09-07	GZ	J	U	326662	21447	Lion	Swamp
2011-08-11	PZ	A	U	326670	20745	Lion	Luai ya ngare Ndare
2013-12-02	PZ	U	U	326722	19522	lion	Mtego wa Twiga
2014-06-08	PZ	U	U	326722	19522	Lion	NA
2011-01-10	GZ	A	F	326723	19522	Lion	Mtego ya twiga
2011-07-11	Impala	A	U	326724	19522	Lion	Mtego ya twiga
2012-02-24	GZ	A	U	326725	19522	Lion	Mtego ya twiga
2006-05-26	GZ	U	F	326738	18744	Lion	NA
2013-05-17	PZ	A	U	326738	18744	lion	laga ya mwangi
2014-06-04	PZ	A	U	326738	18744	Lion	NA
2005-07-24	PZ	U	F	326779	19859	Lion	NA
2010-02-10	PZ	A	M	326799	18699	Lion	Laga ya mwangi
2004-01-15	PZ	U	U	326801	21598	Lion	NA
2004-04-08	PZ	U	U	326802	21598	Lion	NA
U	GZ	J	U	326802	21598	Lion	NA
2004-05-10	GZ	U	U	326804	21598	Lion	NA
2007-06-03	GZ	U	U	326805	21598	Lion	NA
2009-02-14	PZ	U	F	326806	21598	Lion	Bosnia
2011-04-12	PZ	A	F	326808	21598	Lion	Bosnia
2014-04-21	GZ	A	F	326893	25066	Lion	Milima william
2011-08-24	Giraffe	A	M	327022	29435	Lion	Kisima ndogo Leparua
2011-09-15	PZ	A	U	327023	29435	Lion	Kisima ndogo Leparua
2011-07-18	GZ	J	U	327032	23241	Lion	Matekenya
2011-11-07	GZ	SA	M	327044	25507	Lion	Mlima Watalii
2011-10-06	PZ	A	F	327045	25507	Lion	Mlima William
2011-09-20	Eland	J	U	327046	25507	Lion	Mlima William
2006-07-03	Eland	U	U	327047	25507	Lion	NA
2006-09-12	Eland	A	M	327048	25507	Lion	NA
2008-06-17	Eland	SA	F	327049	25507	Lion	NA
2010-03-17	Waterbuck	A	U	327109	25445	Lion	Mlima William
2014-07-06	PZ	A	F	327133	22675	Lion	Matekenya
2014-07-06	PZ	SA	F	327133	22675	Lion	Matekenya
2012-01-11	Waterbuck	A	M	327233	21644	Lion	Bejeto ya Chege
2005-07-22	hyena	U	U	327321	19363	Lion	NA
2009-03-14	Hartebeest	A	M	327322	19363	Lion	Laga ya Fisi
2009-10-30	Hartebeest	A	F	327323	19363	Lion	laga yab Fisi
2009-10-31	Hartebeest	A	M	327324	19363	Lion	laga ya Fisi
2013-10-13	buffalo	SA	F	327324	19363	lion	mbogani ya bosinia
2014-06-07	Buffalo	SA	F	327324	19363	Lion	NA
2014-07-29	Cheetah	A	M	327324	19363	Lion	Laga ya Fisi
2009-12-17	GZ	U	U	327325	19363	Lion	Laga ya Fisi
2012-04-20	GZ	SA	U	327326	19363	Lion	Dam ya Laga ya fisi
2012-09-09	Eland	A	F	327327	19363	Lion	Laga ya fisi
2013-03-21	PZ	SA	U	327349	18109	lion	laga ya kavu
2014-06-02	PZ	SA	U	327349	18109	Lion	NA
2011-12-23	GZ	A	M	327400	22200	Lion	Ukuta ya bom
2009-01-30	Hartebeest	U	U	327409	18065	Lion	mwarate kavu
2014-08-20	Warthog	A	M	327475	29909	Lion	Ndadapoi
2011-07-18	Impala	A	U	327500	24000	Lion	Mlima Popongi
2013-07-30	GZ	A	U	327500	24000	lion	mbogani ya mlima bobongi
2014-06-28	GZ	A	U	327500	24000	Lion	NA
2012-08-29	GZ	SA	U	327502	28000	Lion	Sagana ya juu
2014-08-19	Greater Kudu	A	F	327564	29947	Lion	Ndadapoi
2014-07-30	Oryx	J	U	327592	24276	Lion	Edge of Swamp
2009-11-06	Buffalo	A	F	327624	19741	Lion	Mbongani ya sobuiga
2010-12-18	PZ	A	F	327625	19741	Lion	Mbogani ya Subuiga
2014-08-01	Eland	J	U	327639	24228	Lion	Edge of Swamp
2014-04-10	GZ	A	U	327730	20447	Lion	Laga ya fisi
2006-09-02	Waterbuck	U	U	327765	18765	Lion	NA
2014-08-16	Giraffe	A	F	327876	21081	Lion	Juu ya kisima ya lewa
2014-04-10	Greater Kudu	A	M	327877	30477	Lion	meza ya Leparua
2009-09-27	GZ	A	F	327959	25638	Lion	chini ya lewa HSE
2006-11-07	GZ	U	M	327997	29269	Lion	NA
2005-06-09	Waterbuck	U	U	328000	22600	Lion	NA
2005-08-19	PZ	U	U	328001	22600	Lion	NA
2009-07-26	PZ	A	F	328001	19626	Lion	sobuiga
2006-02-05	PZ	U	U	328002	27200	Lion	NA
2006-07-29	PZ	U	U	328003	27200	Lion	NA
2006-09-30	GZ	A	M	328004	27732	Lion	NA
2010-06-19	GZ	A	M	328006	27732	Lion	Mlima makutikuti
2011-06-14	GZ	A	M	328007	27732	Lion	Mlima makutikuti
2011-05-17	Waterbuck	A	U	328023	29280	Lion	Dadaboi
2012-03-10	GZ	A	F	328024	29280	Lion	Dadaboi
2013-03-30	Eland	SA	M	328025	29280	lion	mlima nyeusi
2013-07-05	GZ	A	M	328025	29280	lion	Laga ya Dadaboi
2014-07-27	Eland	SA	M	328025	29280	Lion	NA
2014-07-28	GZ	A	M	328025	29280	Lion	NA
2009-07-26	GZ	SA	M	328045	18952	Lion	laga ya sobuiga
2009-11-15	Lion	SA	M	328046	18952	Lion	Laga ya Soboiga
2013-10-26	PZ	SA	F	328055	23156	lion	nyuma ya swamp
2014-06-21	PZ	SA	F	328055	23156	Lion	NA
2009-11-15	Buffalo	A	U	328059	15662	Lion	Laga ya Soboiga
2010-12-08	PZ	A	U	328084	29208	Lion	Mlima Nyeusi
2012-09-27	PZ	A	U	328102	29327	Lion	Ukuta ya laga ya simba
2014-08-30	PZ	A	F	328237	30897	Lion	Mawe nyekundu ya leparua
2013-09-24	PZ	A	U	328266	22455	lion	marathon finishing
2014-06-19	PZ	A	U	328266	22455	Lion	NA
2007-12-15	Ostrich	U	U	328267	22455	Lion	NA
2006-06-28	Impala	J	F	328300	22400	Lion	NA
2013-07-21	GZ	SA	M	328323	22897	lion	Marathon starting
2014-06-20	GZ	SA	M	328323	22897	Lion	NA
2009-09-11	Impala	A	F	328324	22400	Lion	kisima ya lewa
2009-02-02	Hartebeest	U	U	328358	18156	Lion	mnanda ya kondoo
2014-06-09	GZ	SA	U	328362	19404	Lion	Soboiga
2009-10-25	PZ	U	F	328382	22842	Lion	Marathon starting area
2014-08-05	GZ	A	M	328390	22128	Lion	Marathon start
2014-08-18	PZ	A	F	328412	28993	Lion	Milima simba
2014-07-05	Impala	A	F	328428	21245	Lion	Mardadi camp
2014-08-04	GZ	A	M	328429	18320	Lion	Soboiga
2010-10-05	Eland	A	U	328480	18974	Lion	Mlima Tatu
2013-10-10	GZ	A	F	328500	26300	lion	mbogani ya mlima william
2014-07-12	GZ	A	F	328500	26300	Lion	NA
2005-06-21	GZ	U	M	328544	28792	Lion	NA
2014-07-30	Waterbuck	A	M	328670	23200	Lion	Behind Mike's House
2005-10-08	PZ	U	U	328760	25435	Lion	NA
2006-01-19	Eland	U	U	328761	25435	Lion	NA
2006-08-10	GZ	U	U	328763	25435	Lion	NA
2006-08-28	PZ	U	U	328764	25435	Lion	NA
2013-10-03	GZ	A	M	328765	25435	lion	Lewa house
2014-07-11	GZ	A	M	328765	25435	Lion	NA
2011-07-31	Giraffe	J	U	328767	25435	Lion	Between Lewa hse & Kifaru
2012-08-07	GZ	u	U	328768	25435	Lion	Chini ya Lewa House
2007-06-10	Impala	U	U	328785	21973	Lion	NA
2006-01-31	Impala	U	F	328800	22935	Lion	NA
2006-03-01	Giraffe	A	F	328801	22935	Lion	NA
2013-08-23	buffalo	A	M	328897	27678	lion	kisima ya jakwai
2014-07-18	Buffalo	A	M	328897	27678	Lion	NA
2008-06-20	Impala	U	U	328900	22700	Lion	NA
2013-05-15	Eland	A	M	328900	24900	lion	kifaru camp
2013-09-28	GZ	A	M	328900	24900	lion	kifaru camp
2013-10-08	Giraffe	SA	U	328900	28200	lion	Lopoko
2014-07-04	Eland	A	M	328900	24900	Lion	NA
2014-07-05	GZ	A	M	328900	24900	Lion	NA
2014-07-20	Giraffe	SA	U	328900	28200	Lion	NA
2008-03-26	GZ	A	M	328904	23881	Lion	NA
2006-01-02	PZ	U	M	328905	23881	Lion	NA
2005-12-27	PZ	U	M	328906	23881	Lion	NA
2006-01-03	PZ	U	U	328907	23881	Lion	NA
2006-11-11	PZ	U	M	328909	23881	Lion	NA
2013-03-28	PZ	SA	U	328949	23192	lion	chemichemi ya Evi
2013-04-22	waterbuck	A	M	328949	23192	lion	simba Ridge
2013-08-04	PZ	A	U	328949	23192	lion	chemichemi ya Mike
2013-10-20	GZ	SA	F	328949	23192	lion	mike house
2014-06-22	Waterbuck	A	M	328949	23192	Lion	NA
2014-06-23	GZ	SA	F	328949	23192	Lion	NA
2014-06-24	PZ	A	U	328949	23192	Lion	NA
2014-06-25	PZ	SA	U	328949	23192	Lion	NA
2006-01-02	Greater Kudu	U	M	328950	29517	Lion	NA
2006-05-29	Giraffe	A	M	328951	29517	Lion	NA
2009-06-12	GZ	SA	F	328958	22645	Lion	Richard house
2010-10-02	PZ	A	M	328958	29728	Lion	Mlima Kingi
2009-10-08	GZ	SA	F	328964	23822	Lion	Ian,s bridge
2006-01-23	Oryx	U	F	328994	21892	Lion	NA
2009-09-11	Eland	A	U	329005	23136	Lion	chemichemi ya EVI
2009-09-09	Eland	A	F	329006	23136	Lion	chemi chemi ya richard
2010-02-15	Waterbuck	A	M	329007	23136	Lion	Chemichemi ya Richard
2010-06-15	Waterbuck	A	U	329008	23136	Lion	Chemichemi ya Richard
2014-06-29	PZ	A	F	329070	24047	Lion	Milima Ian
2014-03-05	Warthog	A	F	329098	22536	Lion	Airstrip
2014-03-05	Warthog	A	M	329098	22536	Lion	Airstrip
2006-10-06	GZ	A	M	329110	28768	Lion	NA
2014-09-14	GZ	A	U	329114	21712	Lion	Marania
2011-02-01	GZ	A	M	329116	25168	Lion	Btn lewahse and Kifaru
2006-08-25	PZ	U	U	329200	24300	Lion	NA
2012-07-26	GZ	A	F	329201	21200	Lion	Nderi ya ngombe
2014-07-28	PZ	A	M	329212	30456	Lion	Sambara Plains
2006-09-19	PZ	A	U	329231	24533	Lion	NA
2004-04-27	PZ	U	U	329234	24533	Lion	NA
2013-02-04	Warthog	SA	U	329234	24533	lion	Chini ya nyumba ya ian
2014-07-01	Warthog	SA	U	329234	24533	Lion	NA
2013-09-13	PZ	A	M	329245	20890	lion	Lewa community area.
2014-06-12	PZ	A	M	329245	20890	Lion	NA
2009-03-07	GZ	SA	U	329257	22246	Lion	Safaricom village
2011-01-01	Lion	J	M	329288	22712	Lion	Luai ya Richard
2005-08-17	Waterbuck	U	U	329300	21400	Lion	NA
2006-07-10	Buffalo	A	M	329310	21735	Lion	NA
2007-12-24	Warthog	U	U	329311	21735	Lion	NA
2008-06-19	Ostrich	A	F	329312	21735	Lion	NA
2009-03-26	Warthog	SA	U	329313	21735	Lion	Airstrip
2009-09-02	GZ	A	U	329314	21735	Lion	Airstrip
2011-08-28	Warthog	A	M	329315	21735	Lion	Airstrip
2014-10-15	Waterbuck	A	U	329342	24153	Lion	Milima Ian
2009-10-16	Eland	A	M	329357	24440	Lion	kifaru
2014-05-28	PZ	A	F	329374	26790	Lion	Milima Tiim
2011-03-17	PZ	A	U	329400	27700	Lion	Mlima Jakwai
2013-01-16	GZ	A	M	329400	27700	lion	mlima Jakwai
2014-07-19	GZ	A	M	329400	27700	Lion	NA
2012-05-30	Giraffe	A	U	329401	27700	Lion	Laga ngumu ya Mlima nderi
2011-09-13	Giraffe	A	U	329404	27700	Lion	Mlima Jakwai
2010-11-19	GZ	SA	U	329412	24551	Lion	Milima
2005-08-19	Waterbuck	U	U	329500	21400	Lion	NA
2013-07-24	PZ	A	F	329500	21800	lion	Swamp area
2013-10-08	PZ	SA	U	329500	21800	lion	nyuma ya swamp
2014-06-15	PZ	A	F	329500	21800	Lion	NA
2014-06-16	PZ	SA	U	329500	21800	Lion	NA
2008-05-30	Impala	U	M	329505	21800	Lion	NA
2009-02-16	GZ	U	U	329555	21747	Lion	swamp
2009-06-14	Eland	SA	M	329556	21747	Lion	swamp
2009-09-09	Waterbuck	A	F	329557	21747	Lion	workshop gate
2011-10-28	Giraffe	A	M	329564	28001	Lion	Mlima Tim
2008-01-25	Eland	SA	F	329595	27832	Lion	NA
2006-01-21	GZ	U	U	329596	27832	Lion	NA
2005-12-23	PZ	U	U	329597	27832	Lion	NA
2009-03-02	PZ	U	F	329654	27764	Lion	mlima Tim
2014-06-16	GZ	A	M	329661	25627	Lion	Junction tano
2005-08-14	PZ	U	U	329701	25900	Lion	NA
2009-09-16	PZ	A	F	329705	25099	Lion	Jaction tano
2009-10-16	Impala	A	M	329706	25099	Lion	Jaction tano
2009-10-20	GZ	U	F	329707	25099	Lion	Jaction tano
2014-08-23	GZ	A	F	329741	26229	Lion	Sambara Plains
2014-11-05	PZ	A	U	329741	26229	Lion	Sambara Plains
2014-07-12	PZ	A	U	329826	24479	Lion	Ukuta ya nyumba ya ian
2004-04-28	GZ	U	U	329900	26000	Lion	NA
2011-02-25	Oryx	A	F	329900	23500	Lion	Luai ya Richard
2012-10-17	Waterbuck	A	M	329902	23500	Lion	Luai ya Richard
2014-05-28	GZ	A	M	329974	30515	Lion	Mlango ya ndovu
2005-09-11	Elephant	J	U	330011	24932	Lion	NA
2013-12-18	PZ	U	U	330011	24932	lion	luai ya sambara
2014-07-06	PZ	U	U	330011	24932	Lion	NA
2006-01-15	GZ	U	F	330012	24932	Lion	NA
2006-11-05	PZ	U	U	330013	24932	Lion	NA
2014-10-02	Warthog	A	M	330194	25326	Lion	Junction tano
2006-04-21	Oryx	A	M	330231	21675	Lion	NA
2008-06-08	Warthog	U	U	330232	21675	Lion	NA
2014-07-09	PZ	A	F	330289	27947	Lion	Luai ya Shamba
2014-08-06	PZ	A	F	330289	27947	Lion	Luai Ya sambara
2014-08-10	PZ	SA	F	330289	27947	Lion	Laga Ya sambara
2013-09-16	Giraffe	A	U	330319	24833	lion	digbys
2014-07-03	Giraffe	A	U	330319	24833	Lion	NA
2014-07-01	PZ	A	F	330334	30043	Lion	Luai Ya sambara
2005-11-14	GZ	U	M	330400	22806	Lion	NA
2013-07-13	PZ	U	U	330432	21001	lion	laga ya maranya
2014-06-13	PZ	U	U	330432	21001	Lion	NA
2006-06-06	PZ	A	M	330433	28675	Lion	NA
2004-01-26	GZ	U	U	330531	21243	Lion	NA
2006-02-12	PZ	U	U	330562	26894	Lion	NA
2006-09-24	PZ	A	U	330563	26894	Lion	NA
2011-12-15	PZ	A	U	330565	26894	Lion	Mlima Nugu
2014-07-22	GZ	A	U	330624	25835	Lion	Near Junction Tano
2005-06-27	Giraffe	J	U	330696	20910	Lion	NA
2007-10-15	PZ	U	U	330700	23500	Lion	NA
2005-12-26	GZ	U	U	330742	25082	Lion	NA
2009-02-05	Buffalo	U	U	330797	25021	Lion	Ngurunga
2009-05-03	Buffalo	SA	M	330798	25021	Lion	Ngurunga
2009-05-03	Hartebeest	A	M	330799	25021	Lion	Ngurunga
2014-08-26	PZ	SA	M	330952	25140	Lion	Ngurunga
2014-05-16	PZ	A	F	331094	25053	Lion	Digbys
2014-08-07	Eland	A	M	331173	29071	Lion	Isiolo Valley
2014-04-14	PZ	A	F	331188	27231	Lion	Milima nugu
2011-07-28	PZ	A	U	331202	22400	Lion	Rugusu gate
2008-02-27	PZ	U	U	331232	22876	Lion	NA
2012-03-25	PZ	A	M	331234	22876	Lion	Dam ya mama
2004-04-02	PZ	U	U	331235	22876	Lion	NA
2005-10-11	GZ	U	M	331400	26632	Lion	NA
2014-08-02	PZ	A	F	331400	28900	Lion	Milima utalii
2014-08-27	Impala	U	F	331400	28900	Lion	Safaricom Village
2014-08-28	PZ	U	U	331400	28900	Lion	Mlima watalii
2005-10-10	PZ	U	U	331401	26632	Lion	NA
2005-11-14	GZ	U	U	331402	28900	Lion	NA
2007-07-11	GZ	U	U	331403	28900	Lion	NA
2014-08-30	Warthog	A	F	331407	28171	Lion	Isiolo Valley
2011-09-29	Buffalo	A	M	331429	29100	Lion	Mlima Mbogo
2007-07-10	Eland	U	U	331434	24876	Lion	NA
2011-02-07	GZ	A	M	331438	24876	Lion	Digbys
2011-05-23	PZ	A	M	331439	29100	Lion	Mlima mbogo
2011-06-15	GZ	A	F	331440	24876	Lion	Mbogani ya Digbys
2010-12-28	PZ	J	U	331455	28830	Lion	Mlima Watalii
2008-06-23	PZ	U	U	331500	28200	Lion	NA
2013-10-30	PZ	A	M	331500	28200	lion	tank ya sambara
2014-07-21	PZ	A	M	331500	28200	Lion	NA
2014-08-15	Giraffe	A	M	331500	28100	Lion	Dam ya Sambara
2009-10-18	Eland	U	M	331600	25000	Lion	mwarate ya lopoko
2013-11-12	PZ	A	M	331600	25000	lion	kifuko ya digbys
2014-07-10	PZ	A	M	331600	25000	Lion	NA
2014-11-03	Giraffe	A	F	331654	19897	Lion	rugusu road
2010-12-30	PZ	A	U	331655	19897	Lion	Ngiroriti ya matunda
2010-05-16	Eland	A	M	331707	19848	Lion	Matunda
2010-09-04	Lion	A	F	331708	19848	Lion	Matunda
2006-08-01	PZ	U	U	331800	28700	Lion	NA
2014-07-24	Waterbuck	A	F	331800	27900	Lion	Sanje Mbaya
2008-03-14	Oryx	U	U	331801	26700	Lion	NA
2008-03-26	GZ	U	U	331802	26700	Lion	NA
2014-07-13	PZ	U	U	331803	25849	Lion	Mlima Chorowa
2009-05-17	GZ	SA	M	331839	22699	Lion	Rungusu gate
2010-08-16	GZ	J	U	331852	27831	Lion	Sanje Mbaya
2009-04-20	Buffalo	A	F	331854	26635	Lion	mlima choroa
2006-09-30	PZ	A	F	331921	27630	Lion	NA
2006-10-04	PZ	A	M	331922	27630	Lion	NA
2011-07-14	PZ	A	F	331923	27630	Lion	Isiolo valley
2005-02-11	PZ	U	U	331925	27630	Lion	NA
2004-02-29	PZ	U	U	332001	29900	Lion	NA
2014-08-09	PZ	A	M	332136	25615	Lion	Daraja ya wilderness
2005-11-07	PZ	U	U	332202	19100	Lion	NA
2014-04-04	GZ	A	F	332361	23212	Lion	Mlima Lenjoro
2014-04-04	GZ	J	U	332361	23212	Lion	Mlima Lenjoro
2006-04-23	GZ	A	F	332492	24485	Lion	NA
2014-09-12	Beisa Oryx	SA	U	332492	24485	Lion	Mbogani ya milima Lenchoro
2011-01-27	GZ	A	M	332501	29700	Lion	Mlima nderi
2005-12-30	PZ	U	U	332535	26219	Lion	NA
2008-02-25	PZ	U	U	332536	26219	Lion	NA
2004-03-09	PZ	U	U	332542	29517	Lion	NA
2004-03-18	GZ	U	U	332543	29517	Lion	NA
2005-06-05	Eland	U	U	332573	26151	Lion	NA
2010-03-10	Eland	A	M	332756	26897	Lion	Kivuko ya farasi
2012-09-07	PZ	A	M	332757	26897	Lion	Kifuko ya farasi
2006-04-17	Giraffe	J	U	332762	27163	Lion	NA
2013-12-19	Giraffe	J	F	332800	29378	lion	mlima kali
2014-07-29	Giraffe	J	F	332800	29378	Lion	NA
2013-07-09	PZ	A	M	332841	26959	lion	boma ya faru
2014-07-15	PZ	A	M	332841	26959	Lion	NA
2011-04-10	Waterbuck	A	U	332875	29986	Lion	Dam ya Ian
2005-11-09	PZ	U	U	332876	29986	Lion	NA
2005-04-10	Sitatunga	U	U	332877	29986	Lion	NA
2005-03-11	PZ	U	U	333001	29100	Lion	NA
2006-02-06	Impala	J	U	333002	29100	Lion	NA
2006-02-11	PZ	U	U	333003	29100	Lion	NA
2011-10-24	PZ	A	U	333179	29497	Lion	Laga ngumu
2004-01-08	PZ	J	U	333200	25891	Lion	NA
2013-09-15	PZ	A	M	333200	29900	lion	Mlima Mbogo
2014-08-01	PZ	A	M	333200	29900	Lion	NA
2004-04-28	PZ	U	U	333201	25891	Lion	NA
2011-05-15	Impala	A	M	333202	25891	Lion	Kiwanja ya wilderness
2011-09-29	Giraffe	A	M	333203	29900	Lion	Dadaboi
2011-10-11	Giraffe	SA	U	333204	27500	Lion	Mawe ya simba
2009-11-15	Giraffe	A	U	333252	27433	Lion	Ndikir ya Mlima Choroa
2014-06-12	PZ	A	F	333270	27937	Lion	Milima nyeusi
2005-10-10	Impala	U	U	333500	27400	Lion	NA
2005-10-11	Impala	U	M	333501	27400	Lion	NA
2011-05-12	PZ	SA	U	333503	26500	Lion	Daraja ya wilderness
2011-06-17	Eland	A	M	333504	26500	Lion	Daraja ya William
2011-07-23	Warthog	A	U	333505	26500	Lion	Daraja ya wilderness
2011-07-25	Giraffe	SA	U	333506	26500	Lion	Daraja ya wilderness
2012-09-26	Waterbuck	A	M	333507	27400	Lion	Mgongo ya wilderness
2010-04-03	Warthog	A	U	333552	27332	Lion	Mutunyi
2014-08-13	Waterbuck	J	U	333567	26754	Lion	Wilderness area
2010-08-20	Giraffe	SA	F	333594	27593	Lion	M. Nyeusi
2010-08-16	GZ	A	M	333619	26688	Lion	Wilderness
2012-10-05	PZ	A	U	333701	29400	Lion	Mlima viatu
2014-06-24	Impala	A	M	333747	27576	Lion	Milima nyeusi
2005-12-30	PZ	U	U	333832	29841	Lion	NA
2004-04-20	PZ	U	U	333876	27098	Lion	NA
2011-02-25	PZ	J	U	333877	27098	Lion	Lenjoro
2010-03-16	PZ	J	U	333927	27032	Lion	Mlima lenjoro
2004-01-12	GZ	U	U	334105	25239	Lion	NA
2014-08-12	PZ	U	U	334105	25239	Lion	Kisima gate
2011-12-22	GZ	J	U	334106	25239	Lion	Kisima gate
2005-12-23	Giraffe	U	U	334500	29700	Lion	NA
2006-04-20	Warthog	A	U	334501	29700	Lion	NA
2006-04-21	Giraffe	U	U	334502	29700	Lion	NA
2004-02-17	GZ	J	U	334504	26700	Lion	NA
2004-02-17	GZ	J	U	334505	26700	Lion	NA
2005-08-05	PZ	U	U	335200	26700	Lion	NA
2011-06-04	Elephant	SA	M	321867	19753	Lion	Njora
2011-02-28	GZ	A	F	322334	21300	Lion	Alan root
2011-03-04	Waterbuck	A	U	324784	18978	Lion	Mlima twiga
2011-07-11	PZ	A	U	326466	22050	Lion	Bom campsite
